# Supplementary material
Source: MDPI journal article supplement (https://www.mdpi.com/2073-4344/13/1/35)
Supplement: s1 [file s1]

Supplementary Materials *for*:

# **Oxidation Catalysis of Au Nano-Particles Immobilized on Titanium(IV)- and Alkylthiol-Functionalized SBA-15 Type Mesoporous Silicate Supports**

**Tomoki Haketa, Toshiaki Nozawa, Jun Nakazawa, Masaya Okamura and Shiro Hikichi \***

Department of Material and Life Chemistry, Faculty of Engineering, Kanagawa University,  
3-27-1 Rokkakubashi, Kanagawa-ku, Yokohama 221-8686, Japan

List of contents

Figure S1: N<sub>2</sub> adsorption isotherms of Ti(0.5)-SBA<sup>SH</sup>(*y*).

Figure S2: N<sub>2</sub> adsorption isotherms of Ti(*x*)-SBA<sup>SH</sup>(0.5).

Figure S3: XRD of Ti(0.5)-SBA<sup>SH</sup>(*y*).

Figure S4: XRD of Ti(*x*)-SBA<sup>SH</sup>(0.5).

Figure S5: Distributions of the particle size of the immobilized Au on Ti(0.5)-SBA<sup>SH</sup>(*y*) with *y* = 0.5 (top; (a)) and 1 (bottom; (b)).

Figure S6: Reuse test of Ti(0.5)-SBA<sup>SH</sup>(0.5) on the aerobic oxidation of 1-phenylethanol.

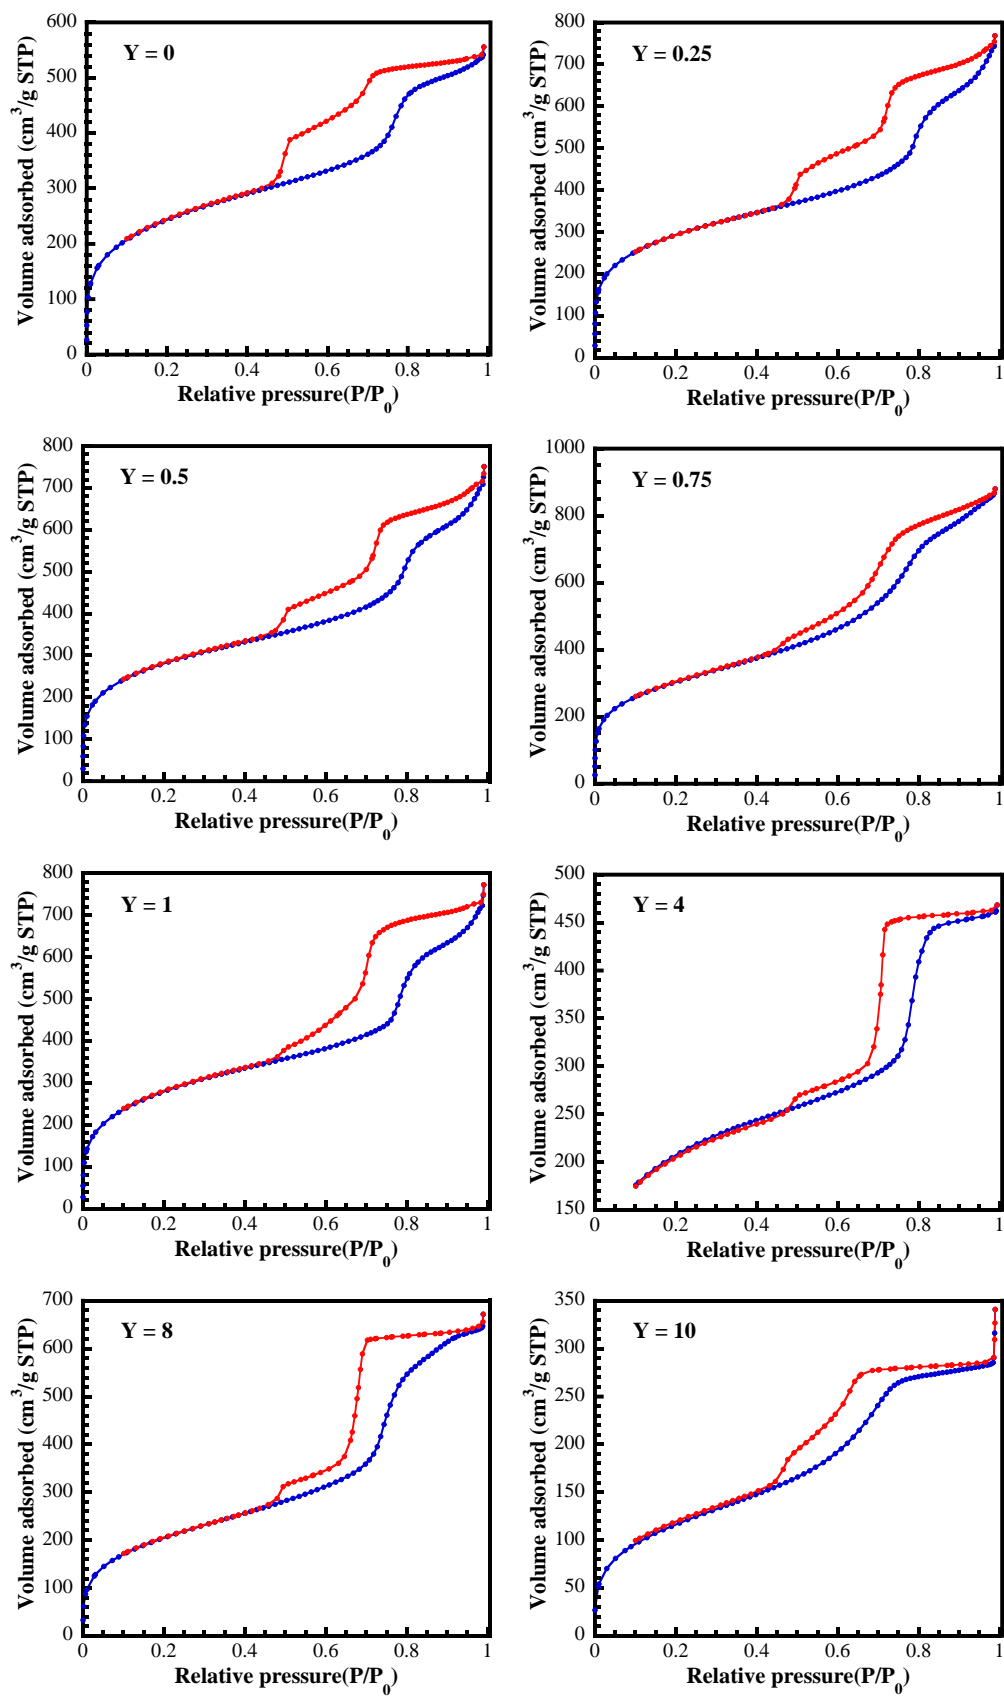

Figure S1.  $N_2$  adsorption isotherms of  $Ti(0.5)-SBA^{SH}(y)$ .

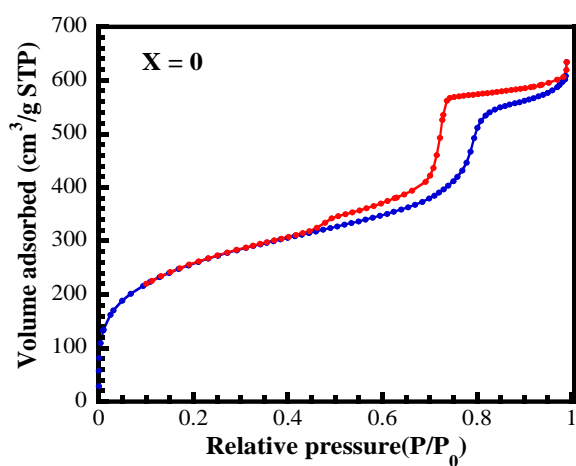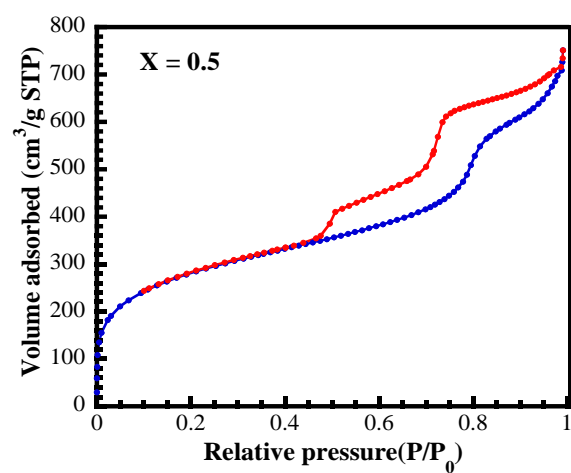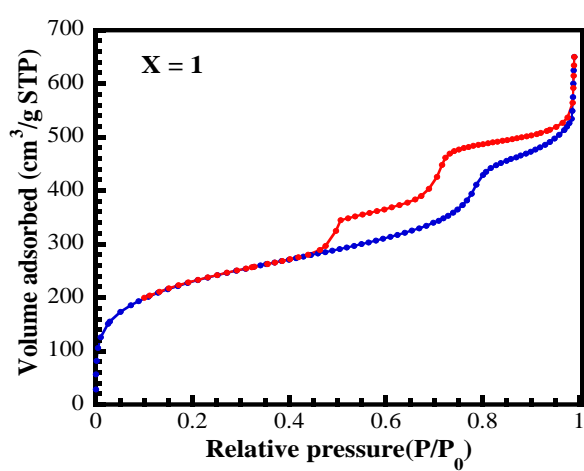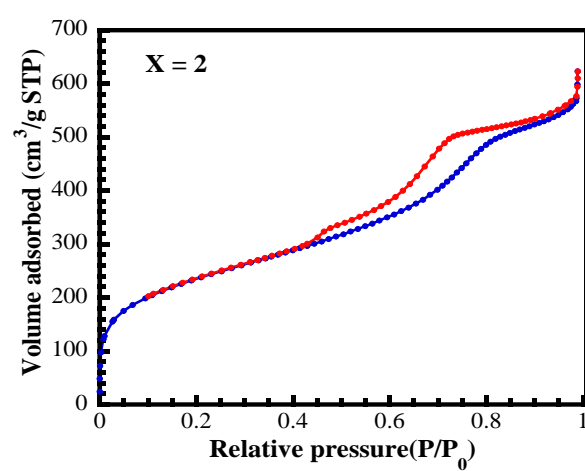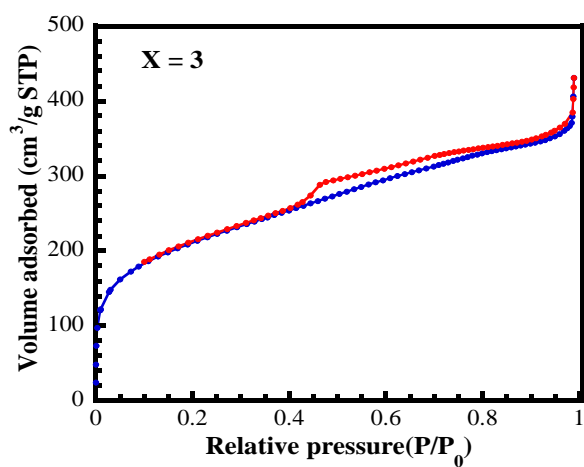

Figure S2.  $\text{N}_2$  adsorption isotherms of  $\text{Ti}(x)\text{-SBA}^{\text{SH}}(0.5)$ .

(a)  $y = 0$

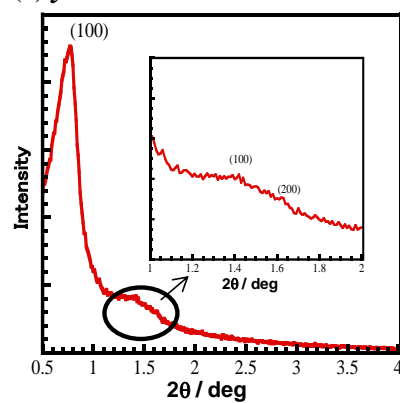

(b)  $y = 0.25$

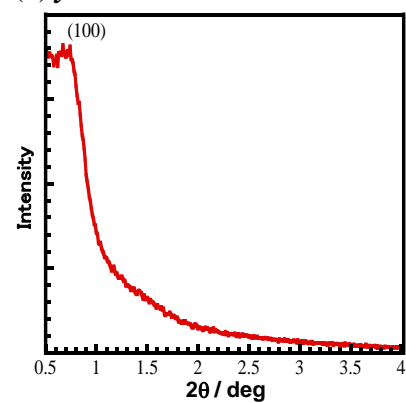

(c)  $y = 0.5$

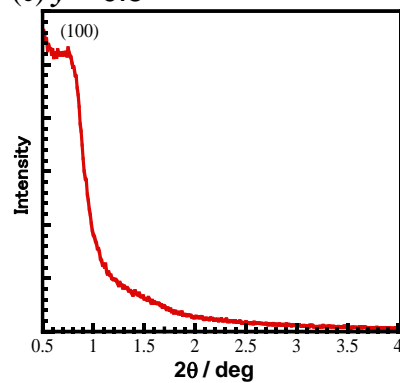

(d)  $y = 1$

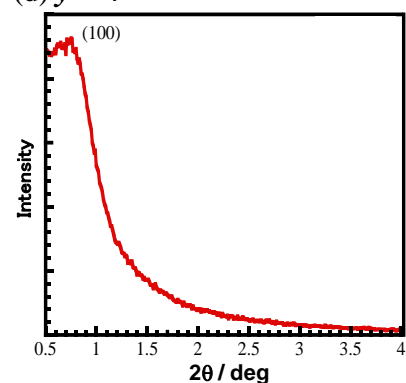

(e)  $y = 2$

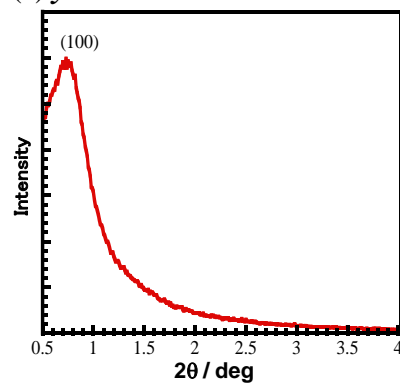

(f)  $y = 4$

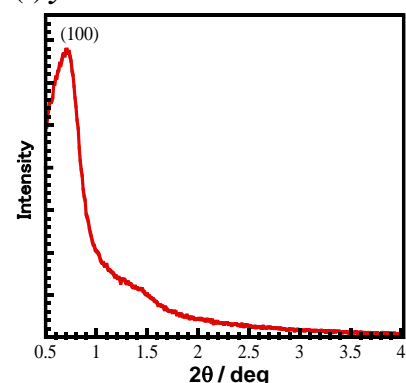

(g)  $y = 8$

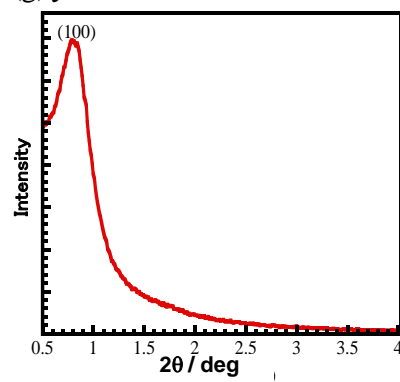

(h)  $y = 10$

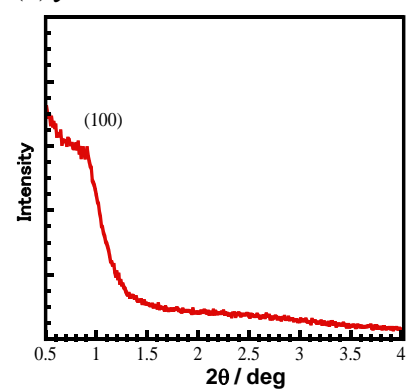

Figure S3. XRD of Ti(0.5)-SBA<sup>SH</sup>( $y$ ).

(a)  $x = 0$

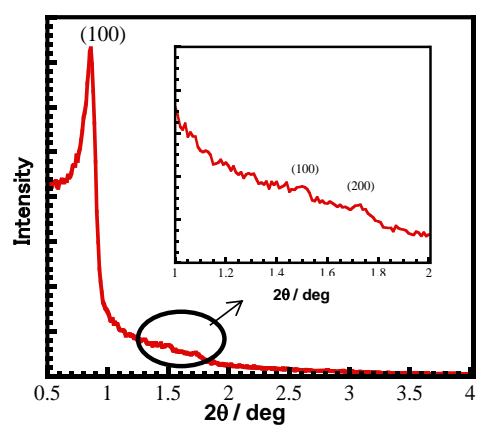

(b)  $x = 0.5$

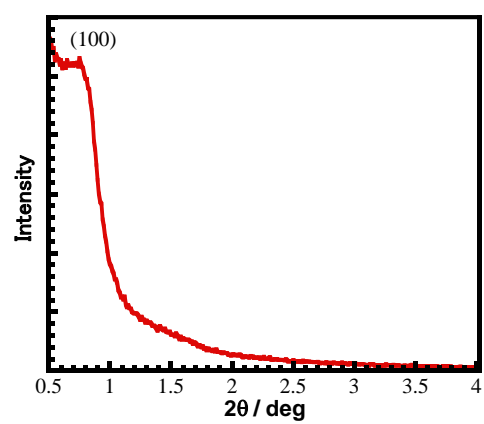

(c)  $x = 1$

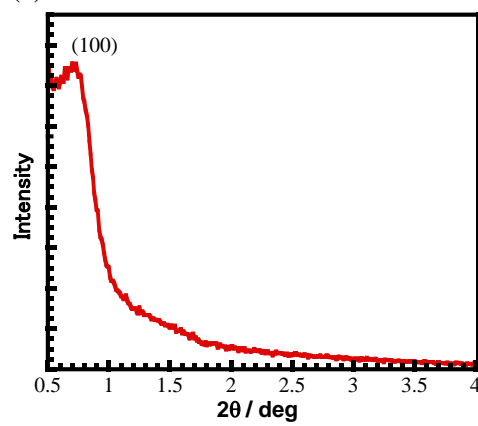

(d)  $x = 2$

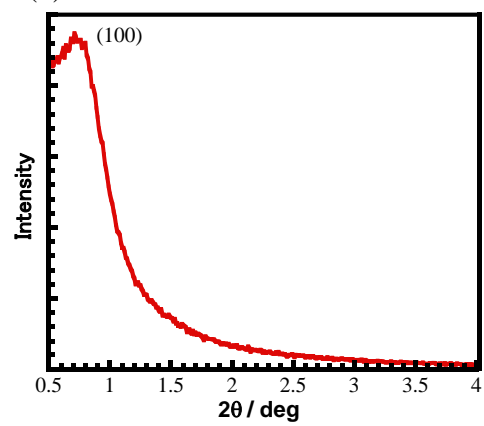

Figure S4. XRD of  $\text{Ti}(x)\text{-SBA}^{\text{SH}}(0.5)$ .

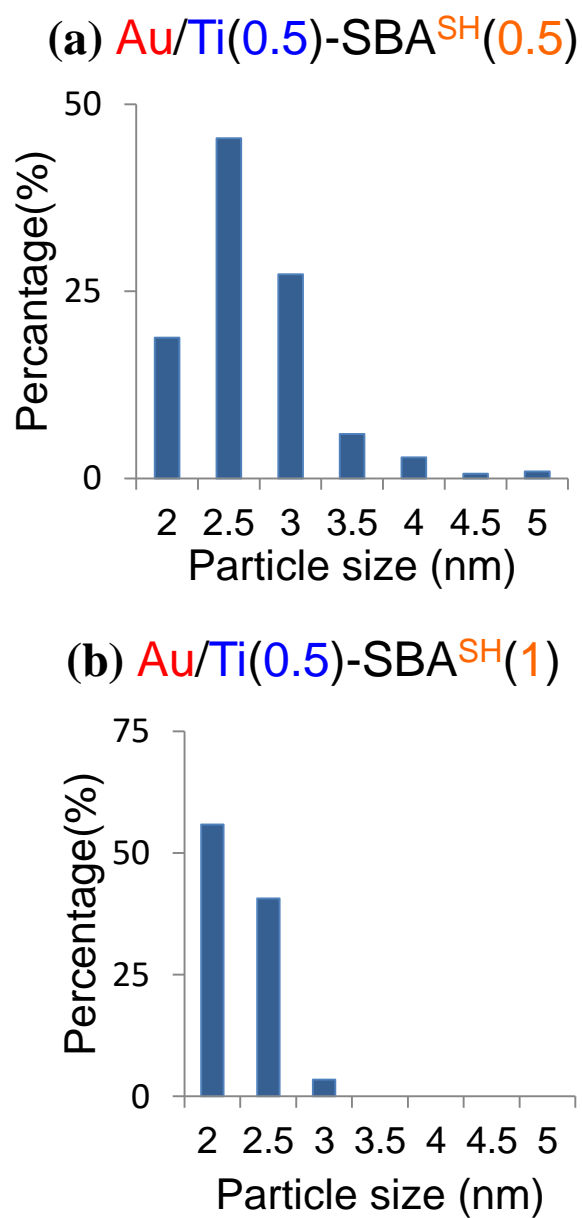

Figure S5. Distributions of the particle size of the immobilized Au on  $\text{Ti(0.5)-SBA}^{\text{SH}}(y)$  with  $y = 0.5$  (top; (a)) and 1 (bottom; (b)).

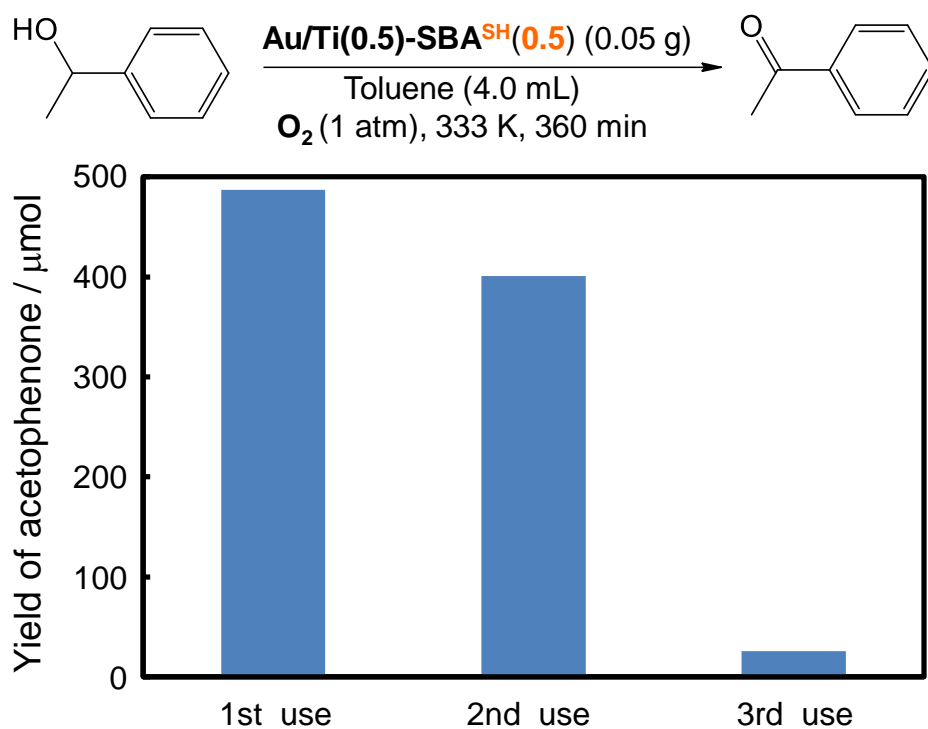

Figure S6: Reuse test of  $\text{Ti(0.5)-SBA}^{\text{SH}}(0.5)$  on the aerobic oxidation of 1-phenylethanol.
